# Supplementary material for: The loss of photosynthetic pathways in the plastid and nuclear genomes of the non-photosynthetic mycoheterotrophic eudicot Monotropa hypopitys
Source: PubMed Central journal article supplement (PMC5123295; doi:10.1186/s12870-016-0929-7), 2016-11-16
Supplement: 12870_2016_929_MOESM1_ESM.pdf [file 12870_2016_929_MOESM1_ESM.pdf]

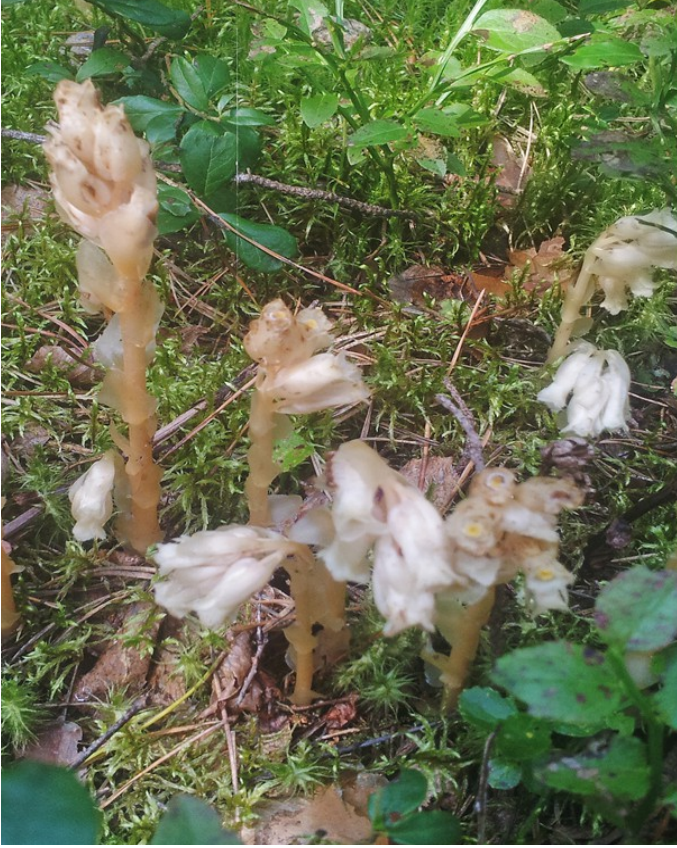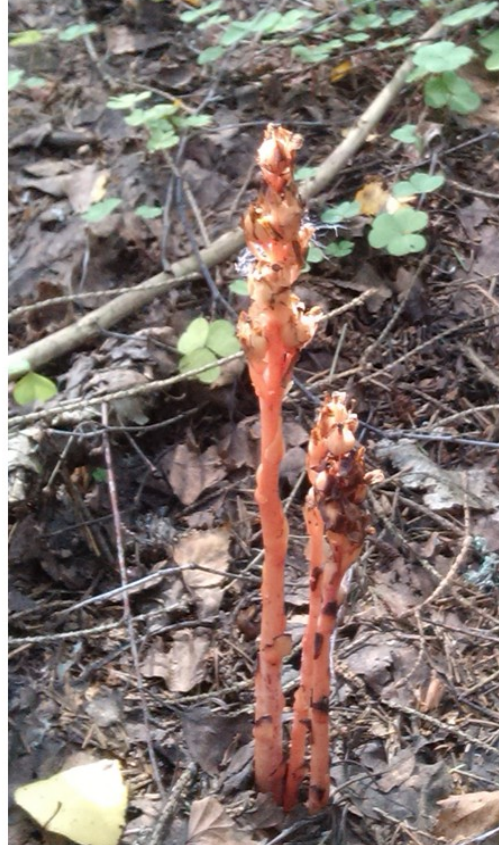

Figure S1. *M. hypopitys* plants in its natural environment.
