# Supplementary material for: The loss of photosynthetic pathways in the plastid and nuclear genomes of the non-photosynthetic mycoheterotrophic eudicot Monotropa hypopitys
Source: PubMed Central journal article supplement (PMC5123295; doi:10.1186/s12870-016-0929-7), 2016-11-16
Supplement: 12870_2016_929_MOESM3_ESM.pdf [file 12870_2016_929_MOESM3_ESM.pdf]

### *M. hypopitys* MON1 plastome

```
2461   atatagtgataatTTGATTCTTCGTCGTCGTAATAGAAAATAAATTATATTTCTCTATT
2521   catttatcttaaaaaaaaaatgggggggaggaagctgtgacagactcactaaaaggaaagcc
2581   ttttgtaagaaagccctatgtaagaaagccctatgtaagaaagccttttgtaagaaagcc
2641   ctatgtaagaaagccctatgtaagaaagccctatgtaactaaaaaaaaagggattttgtagc
2701   tcttcatttattaaaaaaaaattgaaaagcttaaaacaaaaaaaaagaataataagaacttg
2761   gtcccgggcatctaccattatacccgaaatggtcggccatactattgctattcataatgg
2821   aaaagagcatttacctatcttcataaaagcagttatgctaggtcataaattgggagaatt
2881   ttcgcctacgtgtaatTTCTAGACCATGGGAAAGGTGATAAGCGATCTCGTCGTTAA
```

### *M. hypopitys* MON2 plastome

```
2538   gaagagaaattagatttataatTTTATCTTAAAAAAGGGAGGA
2581   agctatgacagactcacttaaaagaagtcctatgtaagaaagccctatgtaagaaagcc
2641   ctatgtactaaaaaaaaagggattttgtagctattcatttattaaaaaaaaattgaaaggctta
2701   aaacaaaaggaaagggaataataataacttgggtcccgggcatctactattatacccgaa
2761   atggttggccatactattgctattcataatggaaaagagcatttacctatctttataaaa
2821   gcagttatgataggtcataaattgggagaatttgcacctacgcgaaatttcttagaacat
2881   ggtaaaggtgagaagcgatctcgtcgttaa
```

**Figure S3.** Nucleotide sequences of putative rps19 pseudogene and upstream intergenic regions. Coordinates are shown according to the sequences of *M. hypopitys* MON1-VOLR and *M. hypopitys* MON2-KALR plastomes. GTAAGAAAGCCnTnT repeat is shown by arrows. Grey shading indicates regions exhibiting sequence similarity to Rps19 of *Arbutus unedo* (AEX37346) revealed by BLASTX search (+ strand is shown). Note that these regions contain intact open reading frames but there are no recognizable start codons upstream.
